# Supplementary material for: Characterization of iRGD-Ligand Modified Arginine-Histidine-Rich Peptides for Nucleic Acid Therapeutics Delivery to αvβ3 Integrin-Expressing Cancer Cells
Source: PubMed Central journal article supplement (PMC7601072; doi:10.3390/ph13100300), 2020-10-10
Supplement: pharmaceuticals-13-00300-s001.pdf [file pharmaceuticals-13-00300-s001.pdf]

## **Characterization of iRGD-ligand modified arginine-histidine-rich peptides for nucleic acid therapeutics delivery to $\alpha v \beta 3$ integrin-expressing cancer cells**

**Anna Egorova<sup>1,3</sup>, Alexander Selutin<sup>2</sup>, Marianna Maretina<sup>1,3</sup>, Sergei Selkov<sup>2</sup>, Vladislav Baranov<sup>1</sup> and Anton Kiselev<sup>1,\*</sup>**

<sup>1</sup> Department of Genomic Medicine, D.O. Ott Research Institute of Obstetrics, Gynecology and Reproductology, Mendeleevskaya line 3, 199034 Saint-Petersburg, Russia; egorova\_anna@yahoo.com (A.E.); marianna0204@gmail.com (M.M.); baranov@vb2475.spb.edu (V.B.)

<sup>2</sup> Department of Immunology and Intercellular Interactions, D.O. Ott Research Institute of Obstetrics, Gynecology and Reproductology, Mendeleevskaya line 3, 199034 Saint-Petersburg, Russia; a\_selutin@yahoo.com (A.S.); selkovsa@mail.ru (S.S.)

<sup>3</sup> Institute of Chemistry, Saint Petersburg State University, Universitetskii pr. 26, 198504 Peterhoff, Russia;

\* Correspondence: ankiselev@yahoo.co.uk (A.V); Tel.: +7-812-328-9809

## Contents

|                                                                                                                                         |   |
|-----------------------------------------------------------------------------------------------------------------------------------------|---|
| <b>Figure S1.</b> The flow cytometric detection of $\alpha v\beta 3$ integrins on the surface of 293T, HeLa, and PANC-1 cell lines..... | 3 |
| <b>Figure S2.</b> Cytotoxicity evaluation of free carriers in 293T, HeLa, PANC-1, and MDA-MB-231 cells.....                             | 4 |
| <b>Figure S3.</b> MALDI TOF mass spectra of the peptides.....                                                                           | 5 |
| <b>Table S1.</b> Experimental and theoretical molecular masses of the peptides synthesized.....                                         | 6 |
| <b>Figure S4.</b> SDS-PAGE results for the peptides.....                                                                                | 7 |
| <b>Figure S5.</b> HPLC results for the peptides.....                                                                                    | 8 |
| <b>Figure S6.</b> Free thiol groups measurement by Ellman's assay after 24 h of RGD1 peptide cyclization.....                           | 9 |

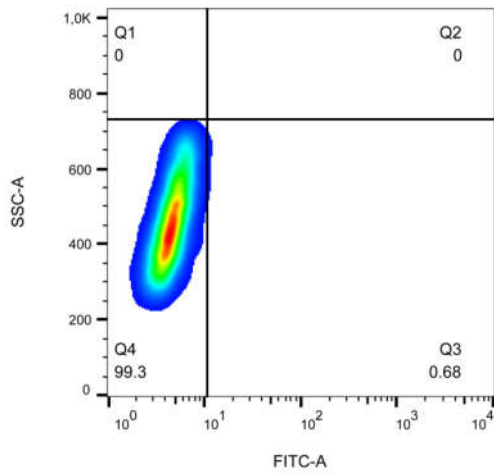

(a)

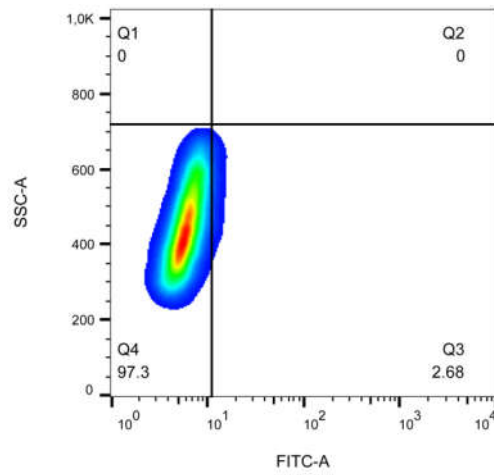

(b)

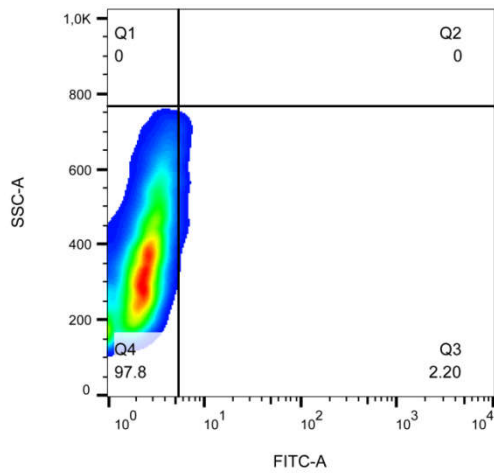

(c)

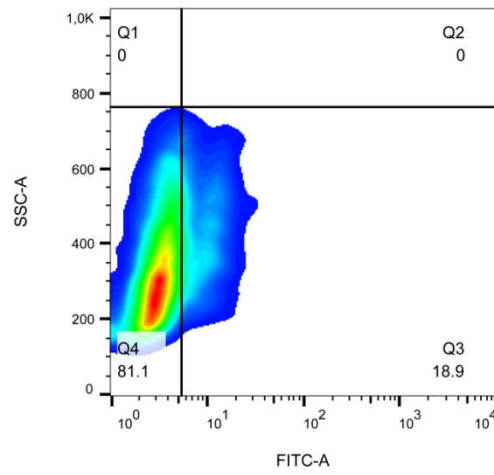

(d)

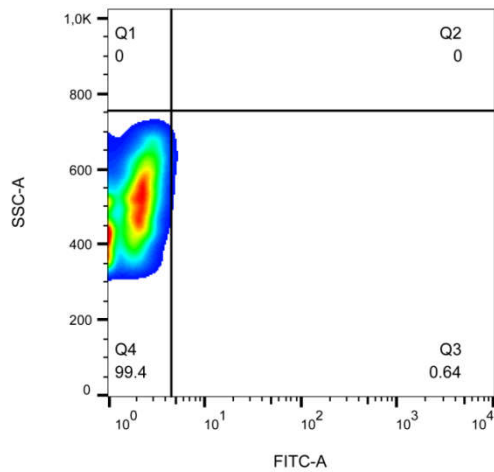

(e)

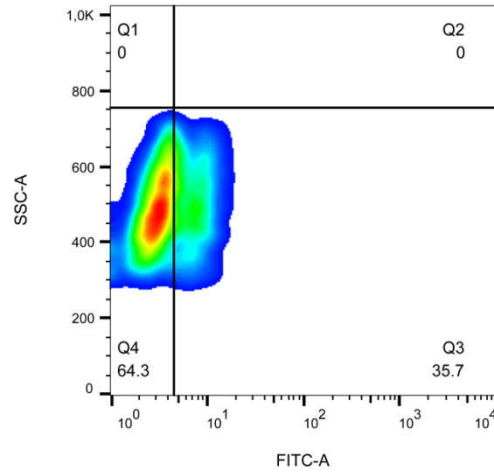

(f)

**Figure S1.** Detection of  $\alpha v\beta 3$  integrins on the surface of 293T (a,b), HeLa (c,d), PANC-1 (e,f) cell lines by flow cytometry analysis. (a,c,e) - unstained cells; (b,d,f) - CD51/CD61 antibody staining. The FACS data were processed by FlowJo software (FlowJo, LLC).

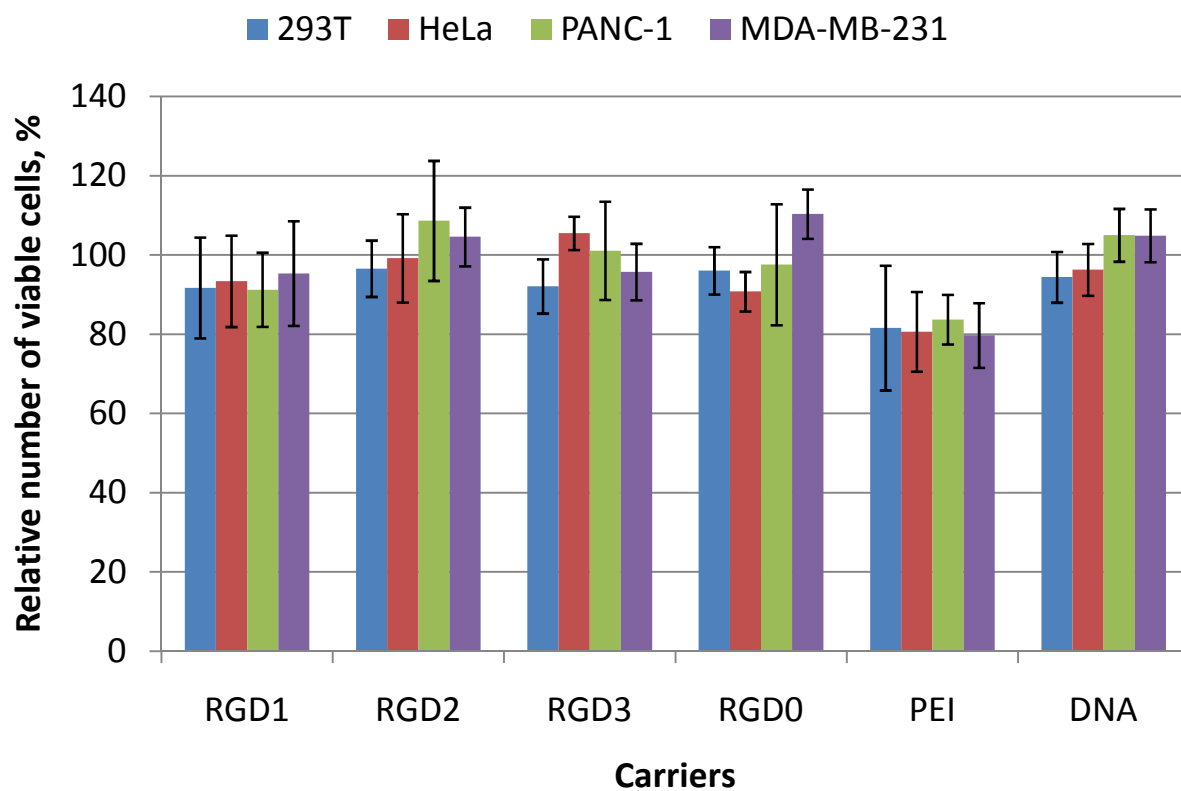

**Figure S2.** Cytotoxicity evaluation of free carriers in 293T, HeLa, PANC-1, and MDA-MB-231 cells by the Alamar blue assay. Values are the mean  $\pm$  SD of the mean of triplicates. Amounts of carriers tested correspond to those applied for formation of NA/carriers complexes at N/P ratio 12/1.

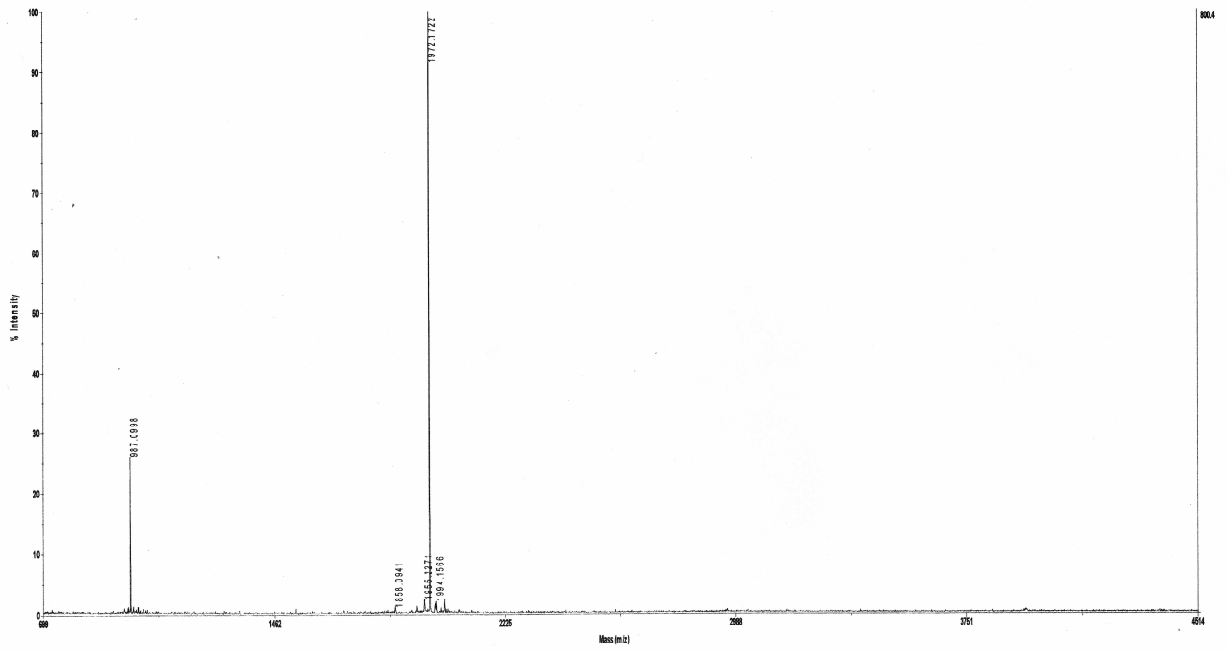

(a)

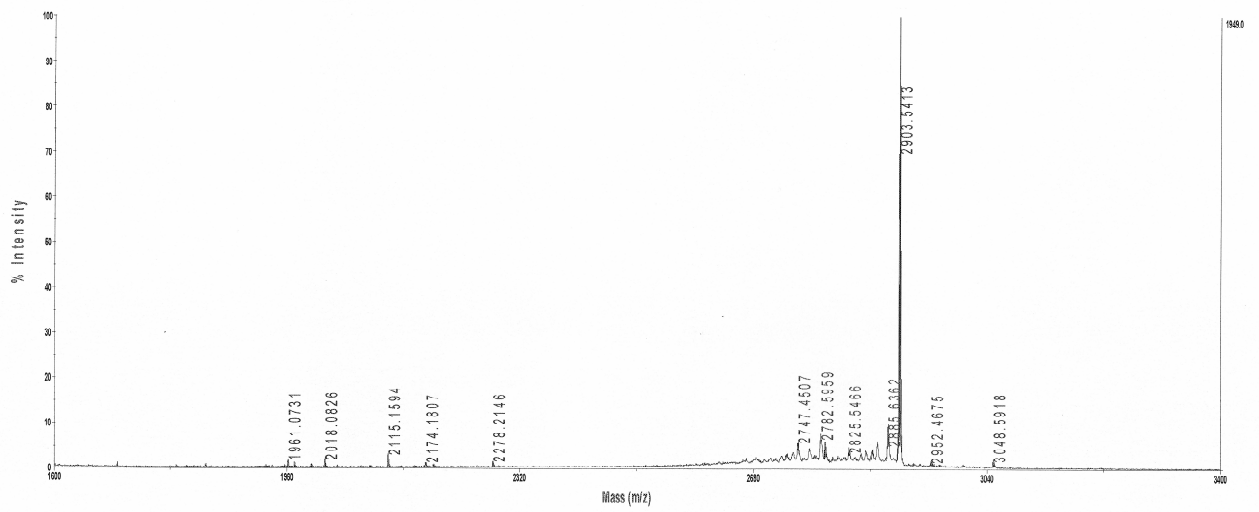

(b)

**Figure S3.** Typical MALDI TOF mass spectra of RGD0 (a) and RGD1 (b) peptides.

**Table S1.** Experimental and theoretical molecular masses of RGD0 and RGD1 peptides.

| Peptide analyzed | Calculated value of molecular mass, g/mole | Experimental value of molecular mass, g/mole |
|------------------|--------------------------------------------|----------------------------------------------|
| RGD0             | 1972.28                                    | 1972.17                                      |
| RGD1             | 2904.33                                    | 2903.54                                      |

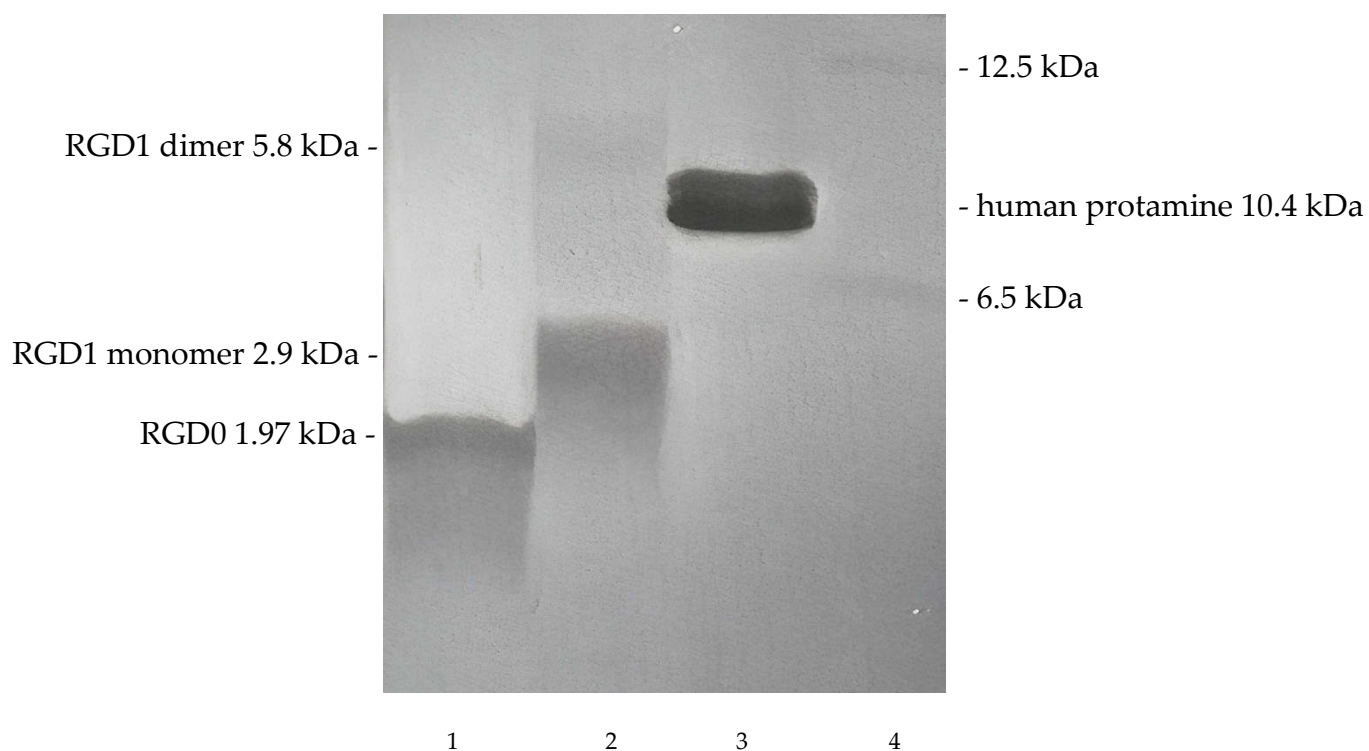

**Figure S4.** SDS-PAGE results for RGD0 (**1**) and RGD1 (**2**) peptides; (**3**) - human protamine 1 protein; (**4**) - protein test mixture 6 for SDS PAGE (SERVA).

**Note 1:** RGD1 dimer cannot be fully denatured by SDS and possesses changed electrophoretic mobility.

**Note 2:** Tricine-sodium dodecyl sulphate-polyacrylamide gel electrophoresis 4%/16.5% (tricine-SDS-PAGE) was performed to separate low-molecular-weight peptides. Human protamine 1 protein (10.4 kDa) and protein test mixture 6 for SDS PAGE (SERVA) were used as molecular weight controls. Coomassie Brilliant Blue was used for the gel staining.

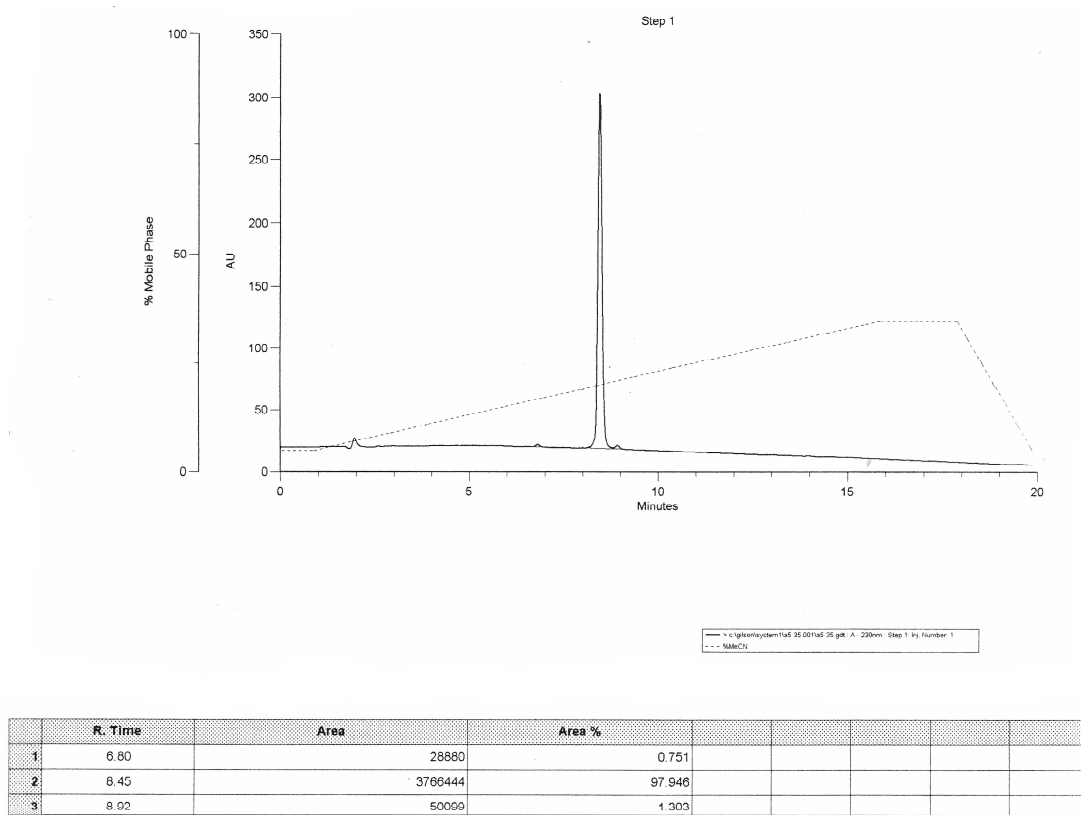

(a)

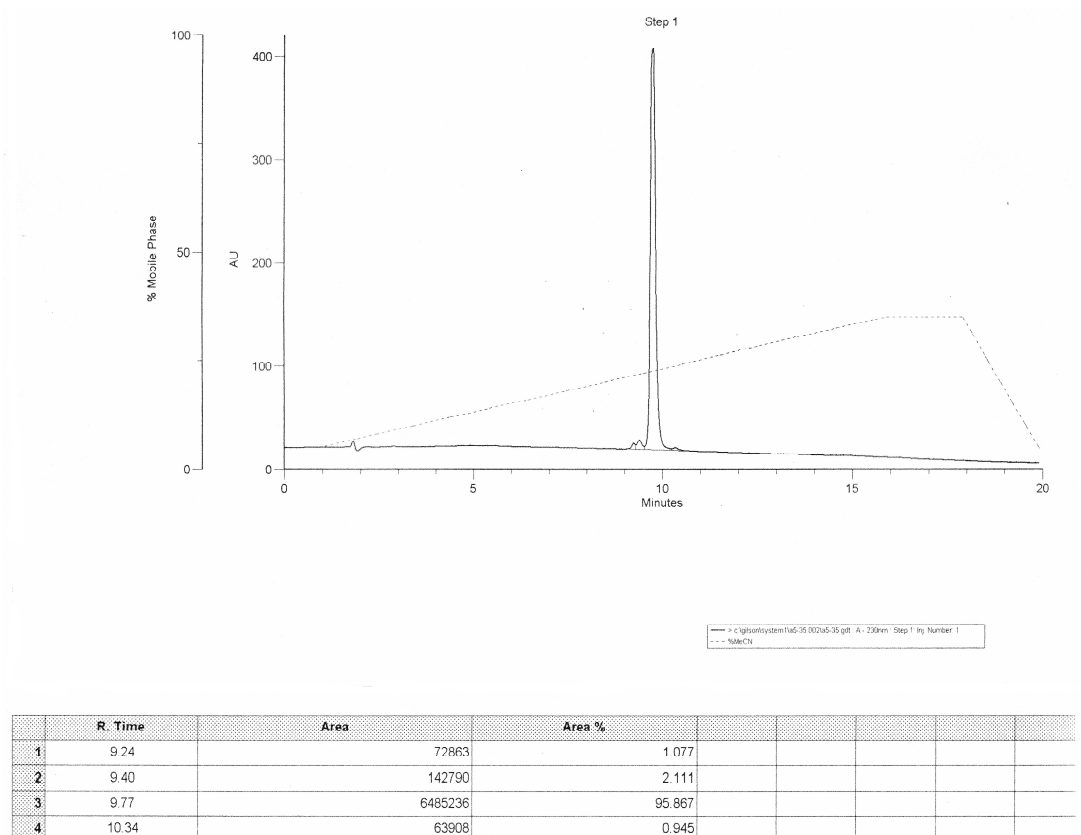

(b)

Figure S5. Typical HPLC results for RGD0 (a) and RGD1 (b) peptides.



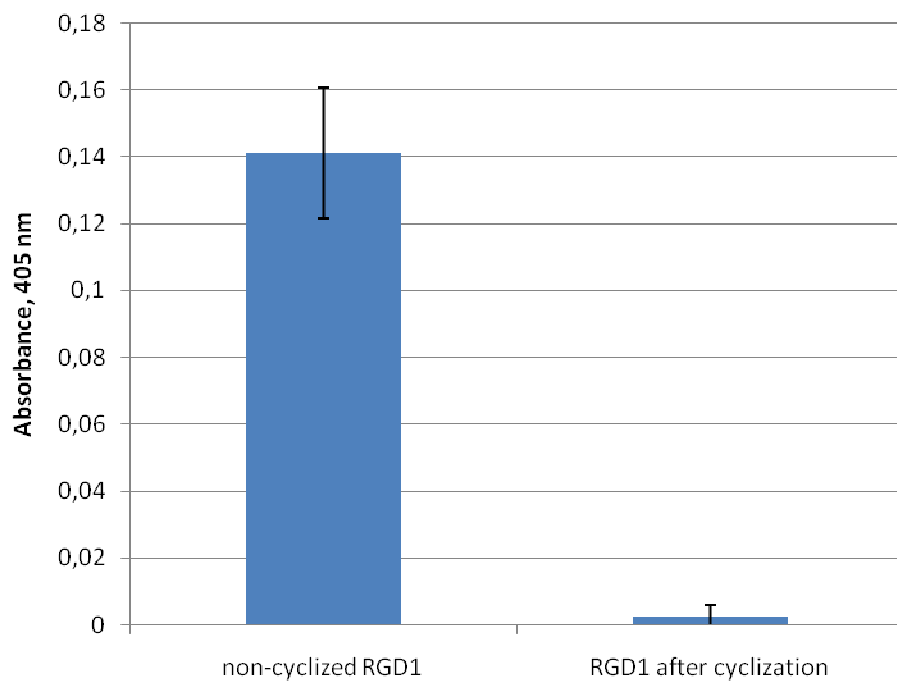

**Figure S6.** Free thiol groups measurement by Ellman's assay after 24 h of RGD1 peptide cyclization.
